# Supplementary material for: Brain transcriptome changes in the aging Drosophila melanogaster accompany olfactory memory performance deficits
Source: PubMed Central journal article supplement (PMC6303037; doi:10.1371/journal.pone.0209405), 2018-12-21

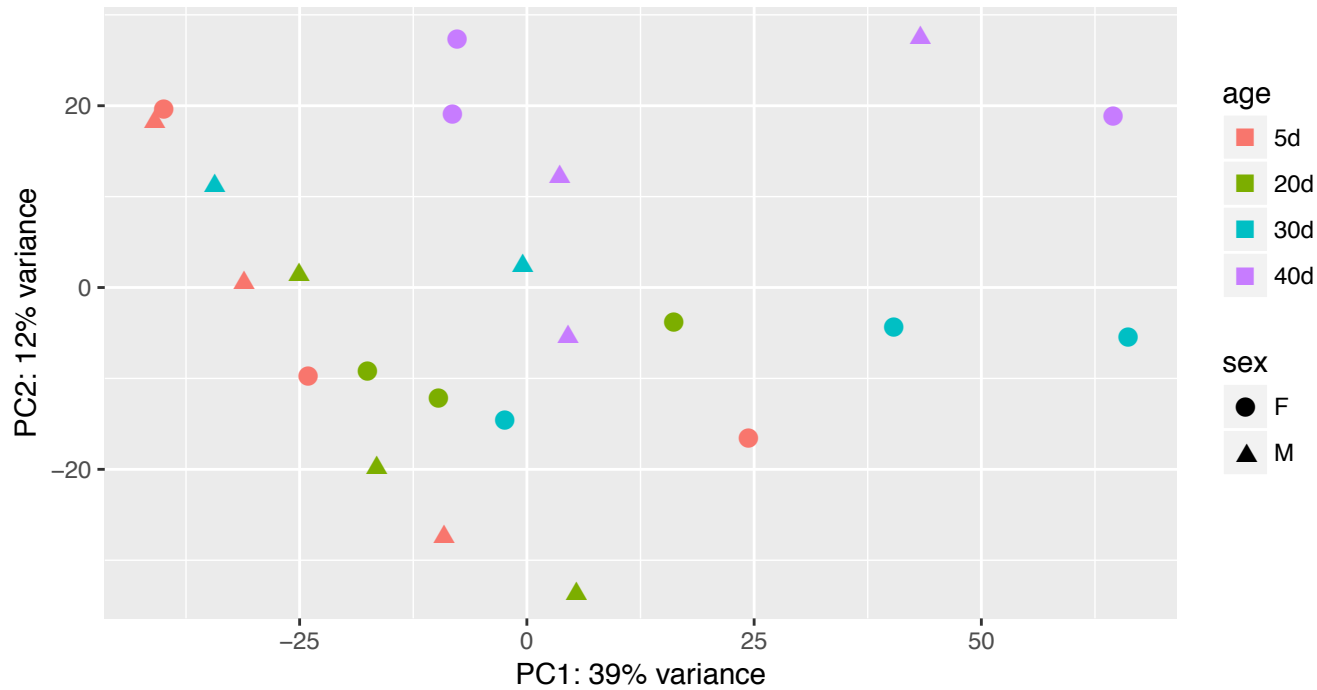

Supplement: pone.0209405.s001.pdf [file pone.0209405.s001.pdf]
