# Supplementary material for: Brain transcriptome changes in the aging Drosophila melanogaster accompany olfactory memory performance deficits
Source: PubMed Central journal article supplement (PMC6303037; doi:10.1371/journal.pone.0209405), 2018-12-21
Supplement: pone.0209405.s003.pdf [file pone.0209405.s003.pdf]

**Fig. S3**

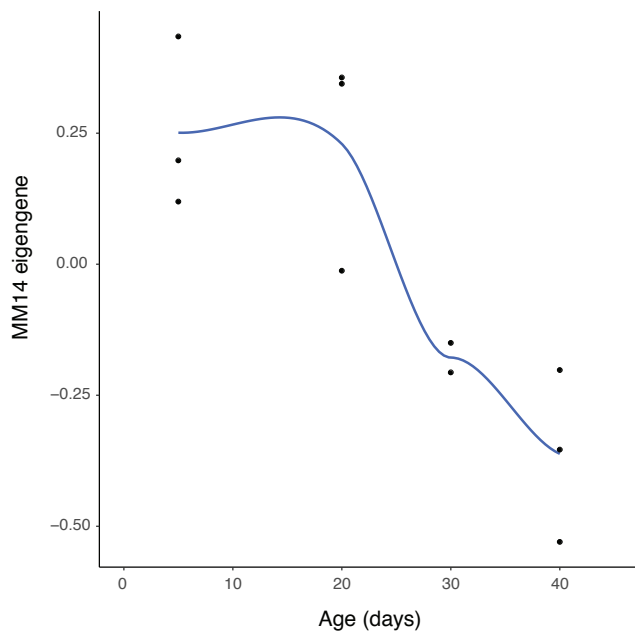

**Supplementary Figure S3** LOESS-fitted curve of eigengene values for MM14 across all ages.
